# Supplementary material
Source: PubMed Central journal article supplement (PMC5675125)
Supplement: NIHMS884890-supplement.pdf [file NIHMS884890-supplement.pdf]

## **METHODOLOGY FOR HEIGHT ADJUSTMENT**

Our estimates of an individual's maximum BMI combine his or her height at survey with his or her maximum weight. Because individuals may lose height as they age, this approach may overestimate BMI at the age when maximum weight is achieved. To estimate the size of the potential bias, we have re-estimated the distribution of maximum BMI by allowing individuals beyond the age at which height loss begins to hypothetically gain height as they move backward in age. The gain in height is estimated using a sex-specific height-loss polynomial estimated on longitudinal data for subjects in the Baltimore Longitudinal Study of Aging.<sup>61</sup> According to the polynomial, height loss is initiated for women aged 48 years and for men aged 51 years. We move individuals backwards in age from their age at survey to the age at which they reported their maximum weight, with no additional adjustments below age 48 years for women and 51 years for men. People without a reported age at maximum weight were excluded from the analysis, leaving 37,548 individuals in NHANES 1999–2014 as the study population.

**Appendix**  
**Prevalence and Trends in Lifetime Obesity in the U.S., 1988–2014**  
**Stokes, Ni, and Preston**

**Appendix Table 1.** Estimates of Lifetime Obesity Prevalence Before and After Adjustment for Height Loss With Age: Ages  $\geq 20$  Years

| Unadjusted results                             | % (SE)          | Adjusted results                               | % (SE)          |
|------------------------------------------------|-----------------|------------------------------------------------|-----------------|
| Total N=37,548                                 |                 | Total N=37,548                                 |                 |
| Measured height (m), mean (SD)                 | 1.690 (0.00065) | Adjusted height (m), mean (SD)                 | 1.696 (0.00064) |
| Max BMI from measured height, mean (SD)        | 30.589 (0.046)  | Max BMI from adjusted height, mean (SD)        | 30.390 (0.046)  |
| Obesity status by max BMI from measured height |                 | Obesity status by max BMI from adjusted height |                 |
| Never obese                                    | 52.96 (0.497)   | Never obese                                    | 53.75 (0.487)   |
| Former obese                                   | 13.46 (0.239)   | Former obese                                   | 12.67 (0.230)   |
| Current obese                                  | 33.59 (0.423)   | Current obese                                  | 33.59 (0.423)   |
| Ever obese                                     | 47.04 (0.497)   | Ever obese                                     | 46.25 (0.487)   |
| Female: N=18,670                               |                 | Female: N=18,670                               |                 |
| Measured height (m), mean (SD)                 | 1.621 (0.00062) | Adjusted height (m), mean (SD)                 | 1.629 (0.00061) |
| Max BMI from measured height, mean (SD)        | 30.590 (0.072)  | Max BMI from adjusted height, mean (SD)        | 30.301 (0.071)  |
| Obesity status by max BMI from measured height |                 | Obesity status by max BMI from adjusted height |                 |
| Never obese                                    | 53.92 (0.564)   | Never obese                                    | 54.96 (0.556)   |
| Former obese                                   | 10.92 (0.279)   | Former obese                                   | 9.88 (0.266)    |
| Current obese                                  | 35.16 (0.518)   | Current obese                                  | 35.16 (0.518)   |
| Ever obese                                     | 46.08 (0.533)   | Ever obese                                     | 45.04 (0.556)   |
| Male: N=18,878                                 |                 | Male: N=18,878                                 |                 |
| Measured height (m), mean (SD)                 | 1.761 (0.00068) | Adjusted height (m), mean (SD)                 | 1.764 (0.00068) |
| Max BMI from measured height, mean (SD)        | 30.587 (0.058)  | Max BMI from adjusted height, mean (SD)        | 30.483 (0.058)  |
| Obesity status by max BMI from measured height |                 | Obesity status by max BMI from adjusted height |                 |
| Never obese                                    | 51.96 (0.607)   | Never obese                                    | 52.50 (0.604)   |
| Former obese                                   | 16.08 (0.327)   | Former obese                                   | 15.54 (0.330)   |
| Current obese                                  | 31.96 (0.533)   | Current obese                                  | 31.96 (0.533)   |
| Ever obese                                     | 48.04 (0.607)   | Ever obese                                     | 47.50 (0.604)   |

*Note:* Correlations for measured height and adjusted height in total population, female, and male are 0.992, 0.973, and 0.994, respectively. Correlations for max BMI from measured height and max BMI from adjusted height in total population, female, and male are 0.998, 0.997, and 0.999, respectively.

m, meter.

**Appendix**  
**Prevalence and Trends in Lifetime Obesity in the U.S., 1988–2014**  
**Stokes, Ni, and Preston**

**Appendix Table 2.** Estimates of Lifetime Obesity Prevalence Before and After Adjustment for Height Loss With Age: Ages  $\geq 48$  Years for Women,  $\geq 51$  Years for Men

| <b>Unadjusted results</b>                      | <b>% (SE)</b>  | <b>Adjusted results</b>                        | <b>% (SE)</b>  |
|------------------------------------------------|----------------|------------------------------------------------|----------------|
| Total N=12,537                                 |                | Total N=12,537                                 |                |
| Measured height (m), mean (SD)                 | 1.663 (0.0012) | Adjusted height (m), mean (SD)                 | 1.681 (0.0011) |
| Max BMI from measured height, mean (SD)        | 31.707 (0.081) | Max BMI from adjusted height, mean (SD)        | 31.007 (0.080) |
| Obesity status by max BMI from measured height |                | Obesity status by max BMI from adjusted height |                |
| Never obese                                    | 44.75 (0.768)  | Never obese                                    | 47.55 (0.722)  |
| Former obese                                   | 12.37 (0.417)  | Former obese                                   | 9.57 (0.351)   |
| Current obese                                  | 42.89 (0.696)  | Current obese                                  | 42.89 (0.696)  |
| Ever obese                                     | 55.25 (0.768)  | Ever obese                                     | 52.45 (0.722)  |
| Female: N=7,163                                |                | Female: N=7,163                                |                |
| Measured height (m), mean (SD)                 | 1.608 (0.0010) | Adjusted height (m), mean (SD)                 | 1.631 (0.0010) |
| Max BMI from measured height, mean (SD)        | 31.696 (0.111) | Max BMI from adjusted height, mean (SD)        | 30.851 (0.110) |
| Obesity status by max BMI from measured height |                | Obesity status by max BMI from adjusted height |                |
| Never obese                                    | 45.59 (0.887)  | Never obese                                    | 48.63 (0.847)  |
| Former obese                                   | 10.99 (0.488)  | Former obese                                   | 7.94 (0.412)   |
| Current obese                                  | 43.42 (0.838)  | Current obese                                  | 43.42 (0.838)  |
| Ever obese                                     | 54.41 (0.887)  | Ever obese                                     | 51.37 (0.847)  |
| Male: N=5,374                                  |                | Male: N=5,374                                  |                |
| Measured height (m), mean (SD)                 | 1.748 (0.0014) | Adjusted height (m), mean (SD)                 | 1.762 (0.0014) |
| Max BMI from measured height, mean (SD)        | 31.256 (0.112) | Max BMI from adjusted height, mean (SD)        | 31.725 (0.113) |
| Obesity status by max BMI from measured height |                | Obesity status by max BMI from adjusted height |                |
| Never obese                                    | 43.42 (1.166)  | Never obese                                    | 45.82 (1.128)  |
| Former obese                                   | 14.54 (0.603)  | Former obese                                   | 12.14 (0.542)  |
| Current obese                                  | 42.03 (1.076)  | Current obese                                  | 42.03 (1.076)  |
| Ever obese                                     | 56.58 (1.166)  | Ever obese                                     | 54.18 (1.128)  |

*Notes:* Correlations for measured height and adjusted height in total population, female, and male are 0.982, 0.953, and 0.985, respectively. Correlations for max BMI from measured height and max BMI from adjusted height in total population, female, and male are 0.995, 0.994, and 0.997, respectively.

m, meter.
